# Supplementary material for: Partial freezing of rat livers extends preservation time by 5-fold
Source: PubMed Central journal article supplement (PMC9287450; doi:10.1038/s41467-022-31490-2), 2022-07-15
Supplement: 41467_2022_31490_MOESM1_ESM.pdf [file 41467_2022_31490_MOESM1_ESM.pdf]

## SUPPLEMENTAL FIGURES AND TABLES

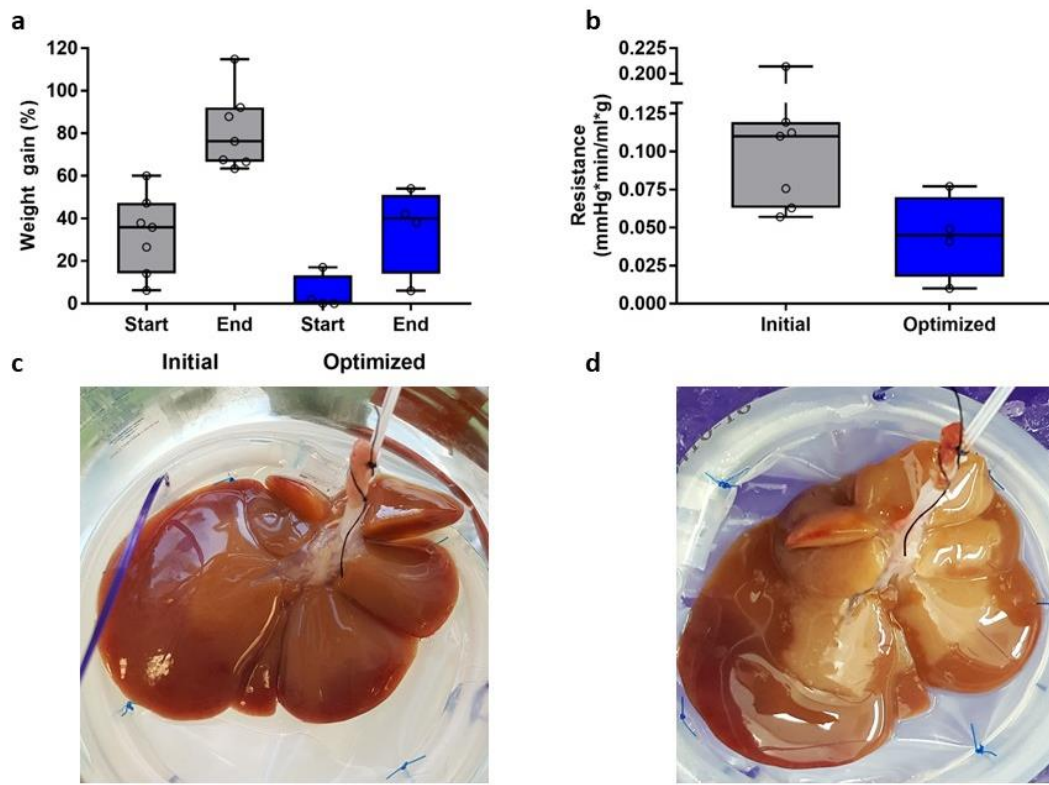

**Supplementary Figure S1:** Optimization of the (un)loading of cryoprotective agents improves gross outcomes after partial freezing. **a**) Weight gain during SNMP recovery during the initial partial freezing protocol (grey) and the optimized protocol (blue). **b**) Vascular resistance between the portal vein and inferior vena cava during SNMP recovery during the initial partial freezing protocol (grey) and the optimized protocol (blue). **c**) Photo showing inhomogeneous preconditioning during with the initial protocol. **d**) Photo showing the extensive and inhomogeneous injury after partial freezing using the initial protocol. Source data are provided as a Source Data file.

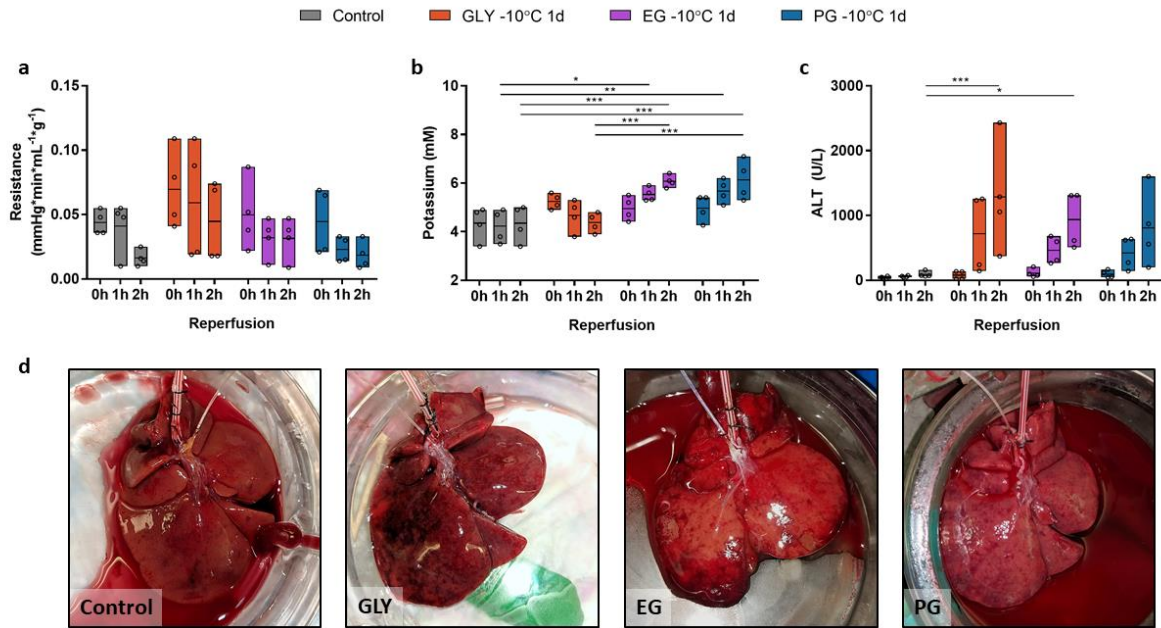

**Supplementary Figure S2:** Effect of permeating cryoprotective agents on liver function and injury after partial freezing at  $-10^{\circ}\text{C}$  for 1 day. **a)** Vascular resistance between the portal vein and the intrahepatic vena cava. **b)** Potassium concentration in the intrahepatic vena cava (IVC). **c)** Alanine aminotransferase concentration (ALT) in the IVC. **d)** Photos of the livers at the end of simulated transplantation. Controls (grey)= 1 day hypothermic preservation, GLY= glycerol (red), EG = ethylene glycol (purple), PG = propylene glycol (dark blue). Stars denote statistical significance (two-way ANOVA, followed by Tukey's post-hoc test):  $*0.01 < p < 0.05$ ;  $**0.001 < p < 0.01$ ;  $***0.0001 < p < 0.001$ ;  $****p < 0.0001$ . Boxes: Floating bars (min to max), with a line at the mean. Source data are provided as a Source Data file.

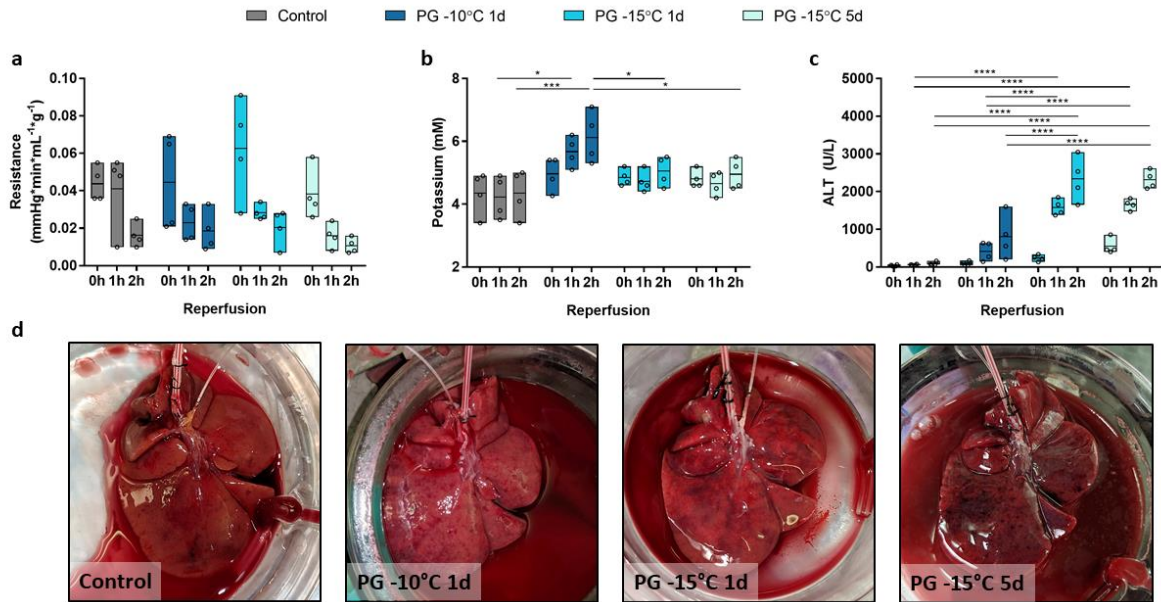

**Supplementary Figure S3:** Effect of storage temperature (-10 vs. -15°C) and duration of storage (1 vs. 5 days) on liver function and injury after partial freezing with propylene glycol. **a)** Vascular resistance between the portal vein and the intrahepatic vena cava. **b)** Potassium concentration in the intrahepatic vena cava (IVC). **c)** Alanine aminotransferase concentration (ALT) in the IVC. **d)** Photos of the livers at the end of simulated transplantation. Controls (grey) = 1 day hypothermic preservation, PG = propylene glycol stored for 1 day at -10°C (dark blue), 1 day at -15°C (blue), and 5 days at -15°C (light blue). Stars denote statistical significance (two-way ANOVA, followed by Tukey's post-hoc test): \*0.01 < p < 0.05; \*\*0.001 < p < 0.01; \*\*\*0.0001 < p < 0.001; \*\*\*\*p < 0.0001. Boxes: Floating bars (min to max), with a line at the mean. Source data are provided as a Source Data file.

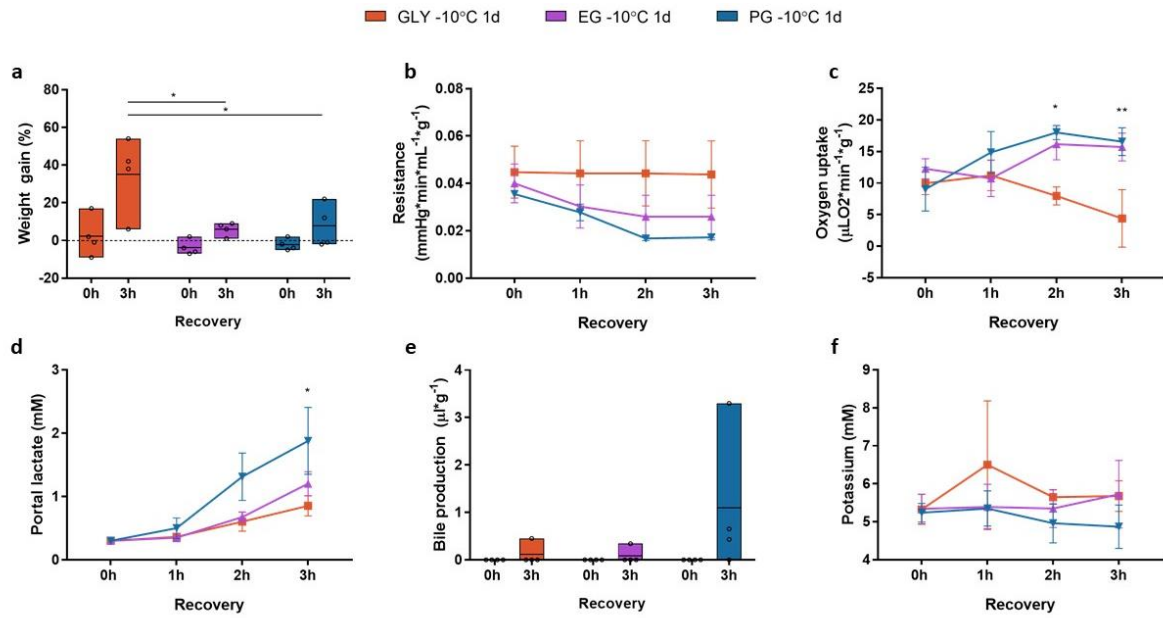

**Supplementary Figure S4:** Effect of permeating cryoprotective agents on liver viability and injury during subnormothermic recovery. **a)** Weight gain as percentage of the procurement weight. **b)** Vascular resistance between the portal vein and the intrahepatic vena cava. **c)** Oxygen uptake. **d)** Lactate concentration in the portal vein. **e)** Bile production. **f)** Potassium concentration in the intrahepatic vena cava. GLY= glycerol (red), EG = ethylene glycol (purple), PG = propylene glycol (dark blue). Stars denote statistical significance (two-way ANOVA, followed by Tukey's post-hoc test): \*0.01 < p < 0.05; \*\*0.001 < p < 0.01; \*\*\*0.0001 < p < 0.001; \*\*\*\*p < 0.0001. Boxes: Floating bars (min to max), with a line at the mean. Lines: mean, error bars: SEM. Source data are provided as a Source Data file.

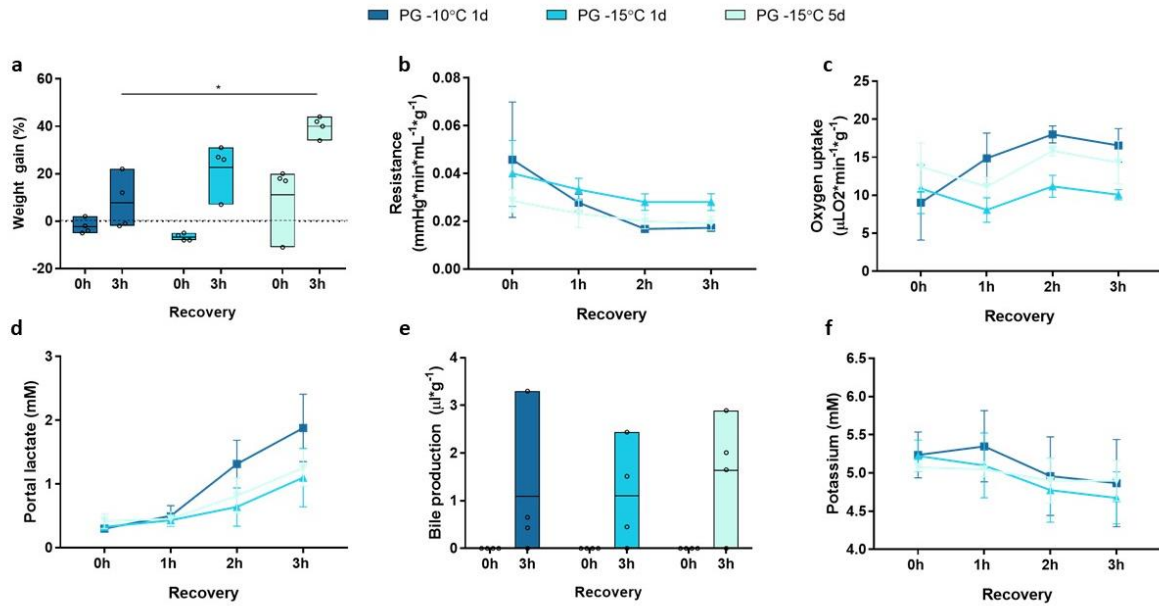

**Supplementary Figure S5:** Effect of freezing temperature and storage duration on liver viability and injury during subnormothermic recovery. **a)** Weight gain as percentage of the procurement weight. **b)** Vascular resistance between the portal vein and the intrahepatic vena cava. **c)** Oxygen uptake. **d)** Lactate concentration in the portal vein. **e)** Bile production. **f)** Potassium concentration in the intrahepatic vena cava. PG = propylene glycol stored for 1 day at -10°C (dark blue), 1 day at -15°C (blue), and 5 days at -15°C (light blue). Stars denote statistical significance (two-way ANOVA, followed by Tukey's post-hoc test): \* $0.01 < p < 0.05$ ; \*\* $0.001 < p < 0.01$ ; \*\*\* $0.0001 < p < 0.001$ ; \*\*\*\* $p < 0.0001$ . Boxes: Floating bars (min to max), with a line at the mean. Lines: mean, error bars: SEM. Source data are provided as a Source Data file.

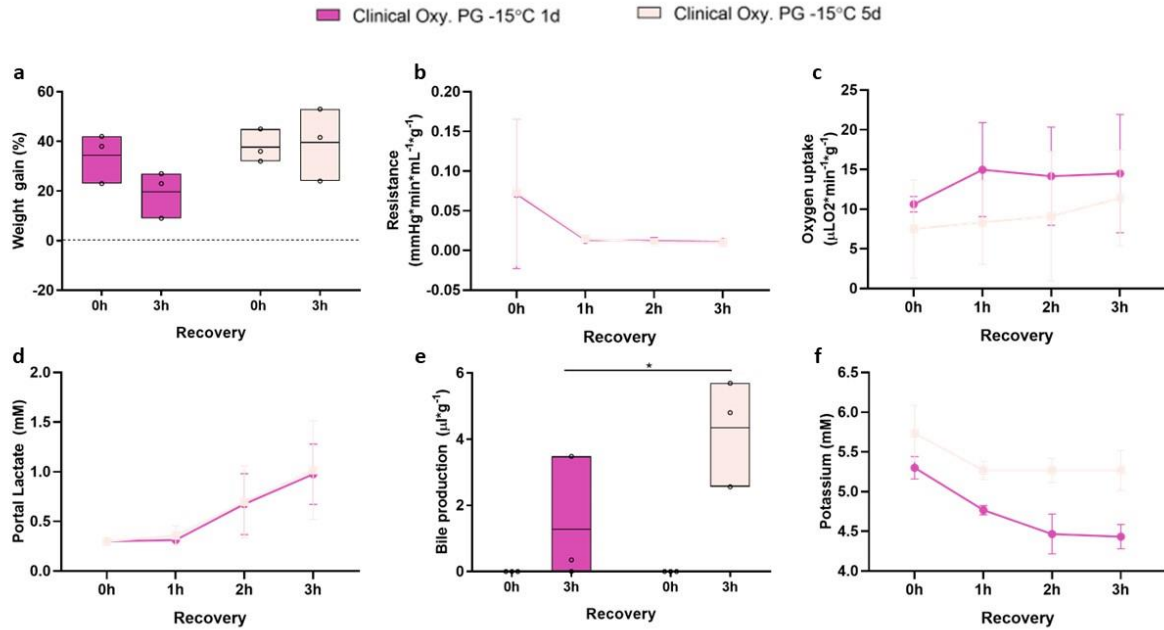

**Supplementary Figure S6:** Effect of a clinical grade oxygenator on liver viability and injury during subnormothermic recovery. **a)** Weight gain as percentage of the procurement weight. **b)** Vascular resistance between the portal vein and the intrahepatic vena cava. **c)** Oxygen uptake. **d)** Lactate concentration in the portal vein. **e)** Bile production. **f)** Potassium concentration in the intrahepatic vena cava. PG = propylene glycol stored for 1 day at  $-15^{\circ}\text{C}$  (dark pink) or 5 days at  $-15^{\circ}\text{C}$  (light pink) perfused using a clinical grade oxygenator. Stars denote statistical significance (two-way ANOVA, followed by Tukey's post-hoc test): \* $0.01 < p < 0.05$ ; \*\* $0.001 < p < 0.01$ ; \*\*\* $0.0001 < p < 0.001$ ; \*\*\*\* $p < 0.0001$ . Boxes: Floating bars (min to max), with a line at the mean. Lines: mean, error bars: SEM. Source data are provided as a Source Data file.



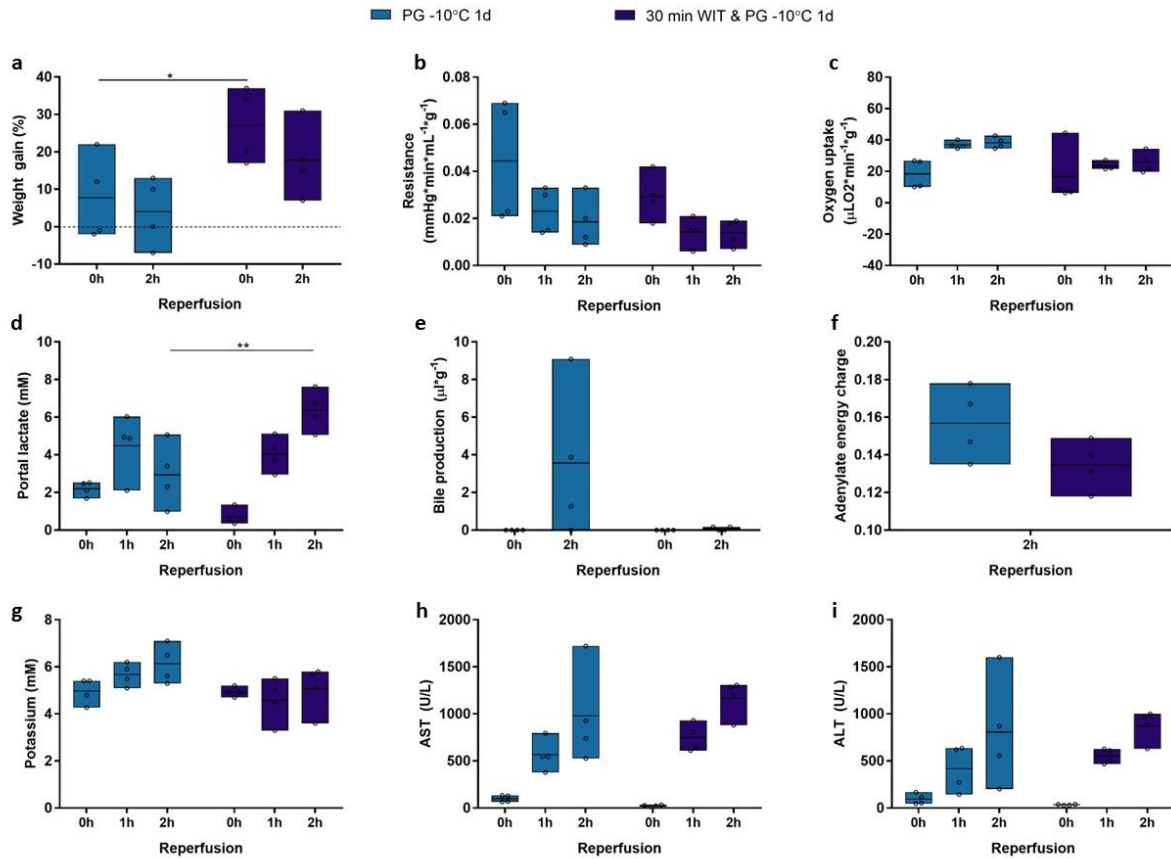

**Supplementary Figure S7:** Effect of 30 minutes warm ischemia time on liver viability and injury after partial freezing with propylene glycol at -10°C for 1 day. **a)** Weight gain as percentage of the procurement weight. **b)** Vascular resistance between the portal vein and the intrahepatic vena cava. **c)** Oxygen uptake. **d)** Lactate concentration in the portal vein. **e)** Bile production. **f)** Tissue adenylylate energy charge. **g)** Potassium concentration in the intrahepatic vena cava. **h)** Aspartate aminotransferase concentration (AST) in the IVC. **i)** Alanine aminotransferase concentration (ALT) in the IVC. PG = propylene glycol (dark blue), 30 min WIT = 30 minutes warm ischemia time (dark purple). Stars denote statistical significance (two-way ANOVA, followed by Tukey's post-hoc test): \*0.01 < p < 0.05; \*\*0.001 < p < 0.01; \*\*\*0.0001 < p < 0.001; \*\*\*\*p < 0.0001. Boxes: Floating bars (min to max), with a line at the mean. Source data are provided as a Source Data file.

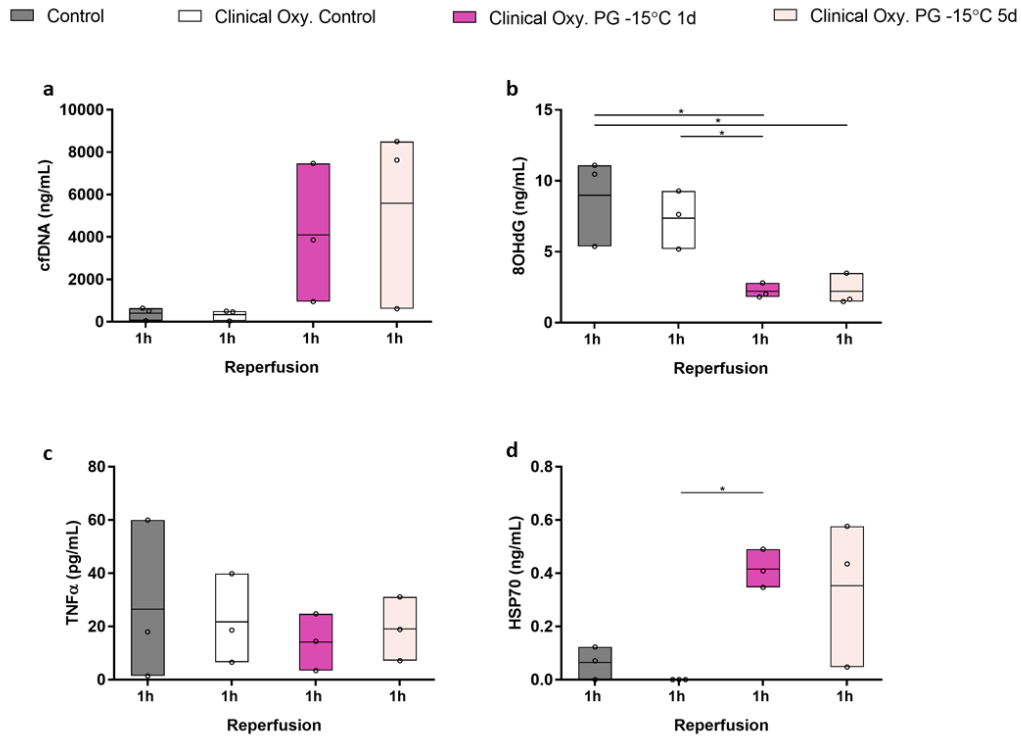

**Supplementary Figure S8:** Effect of a clinical grade oxygenator on damage-associated molecular patterns (DAMPs) after partial freezing with propylene glycol at  $-15^{\circ}\text{C}$  for 1 and 5 days. **a)** cell-free DNA (cfDNA). **b)** 8-oxo-2'-deoxyguanosine (8-OHdG). **c)** Tumor Necrosis Factor  $\alpha$  (TNF $\alpha$ ). **d)** Heat Shock Protein 70 (HSP70). Control (grey) = 1 day hypothermic preservation, Clinical Oxy. Control (white) = 1 day hypothermic preservation perfused using a clinical grade oxygenator, PG = propylene glycol stored for 1 day at  $-15^{\circ}\text{C}$  (dark pink) or 5 days at  $-15^{\circ}\text{C}$  (light pink) perfused using a clinical grade oxygenator. Stars denote statistical significance (one-way ANOVA, followed by Tukey's post-hoc test): \* $0.01 < p < 0.05$ ; \*\* $0.001 < p < 0.01$ ; \*\*\* $0.0001 < p < 0.001$ ; \*\*\*\* $p < 0.0001$ . Boxes: Floating bars (min to max), with a line at the mean. Source data are provided as a Source Data file.



Control Clinical Oxy. Control Clinical Oxy. PG -15°C 1d Clinical Oxy. PG -15°C 5d

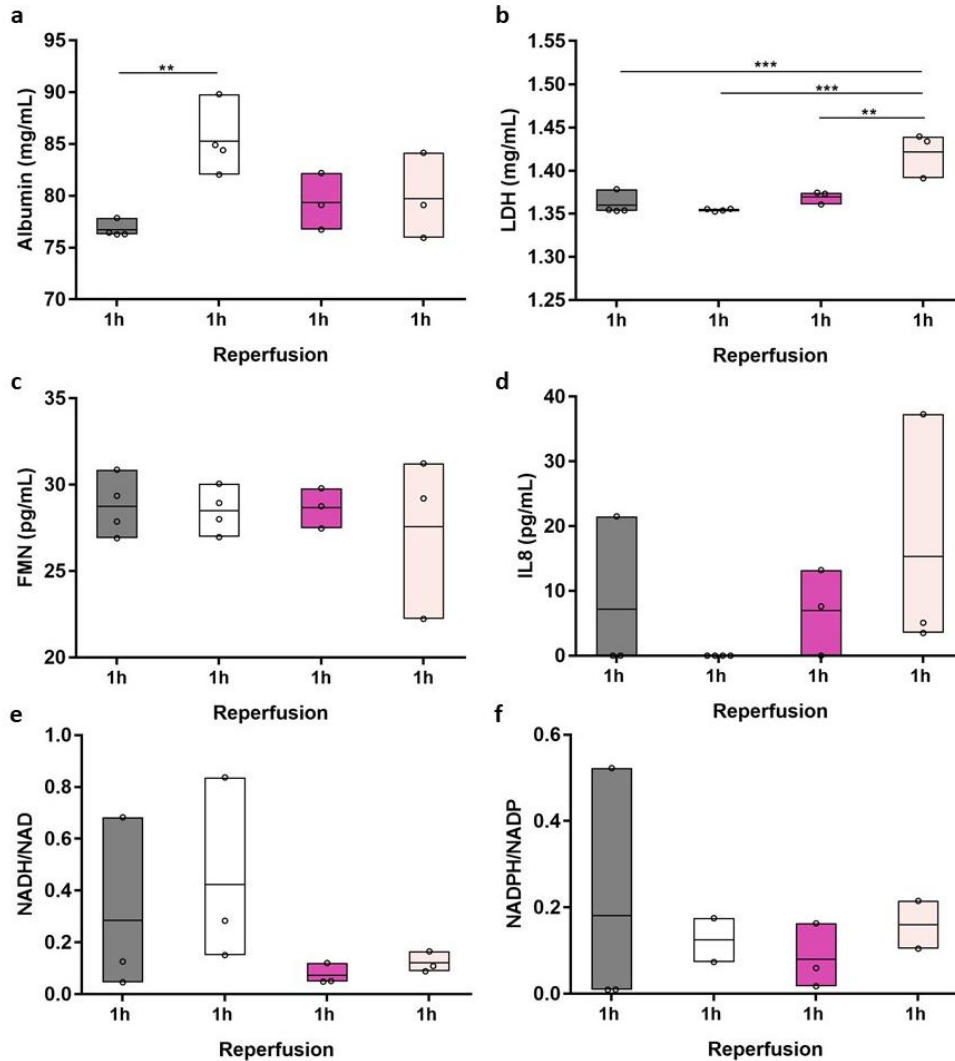

**Supplementary Figure S9:** Effect of a clinical grade oxygenator on liver viability markers after partial freezing with propylene glycol at -15°C for 1 and 5 days. **a)** Albumin. **b)** Lactate Dehydrogenase (LDH). **c)** Flavin Mononucleotide (FMN). **d)** Interleukin-8 (IL8). **e)** Nicotinamide adenine dinucleotide (NADH/NAD) ratio. **f)** Nicotinamide adenine dinucleotide phosphate (NADPH/NADP) ratio. Albumin, LDH, FMN, and IL-8 were measured from the perfusate, while NAD, NADH, NADP, NADPH were measured from tissue. Control (grey) = 1 day hypothermic preservation, Clinical Oxy. Control (white) = 1 day hypothermic preservation perfused using a clinical grade oxygenator, PG = propylene glycol stored for 1 day at -15°C (dark pink) or 5 days at -15°C (light pink) perfused using a clinical grade oxygenator. Stars denote statistical significance (one-way ANOVA, followed by Tukey’s post-hoc test): \*0.01 < p < 0.05; \*\*0.001 < p < 0.01; \*\*\*0.0001 < p < 0.001; \*\*\*\*p < 0.0001. Boxes: Floating bars (min to max), with a line at the mean. Source data are provided as a Source Data file.

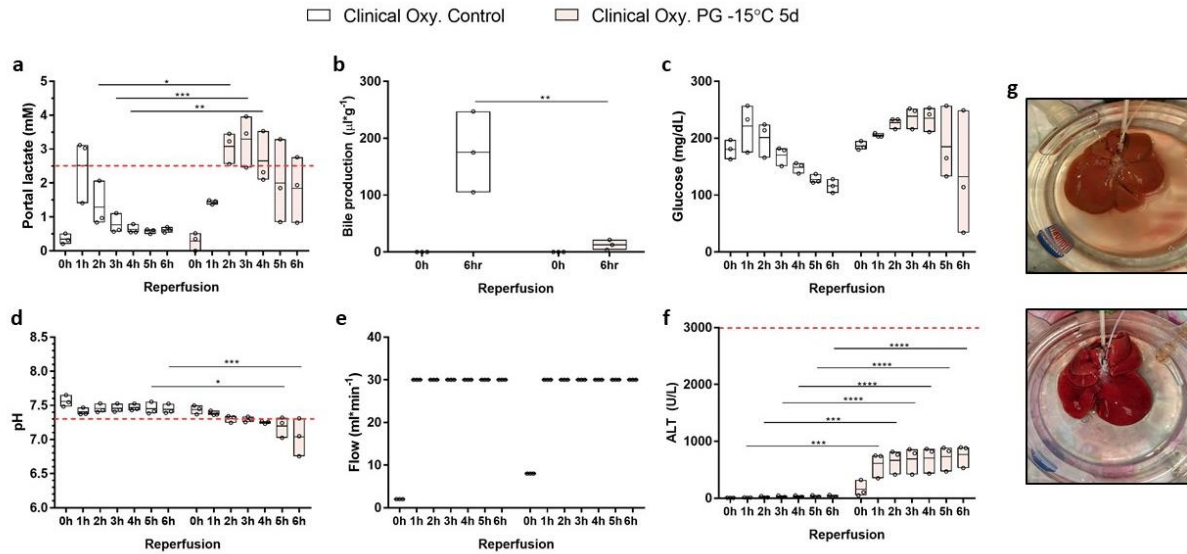

**Supplementary Figure S10:** Effect of 6-hour simulated transplantation in the presence of whole blood with a clinical grade oxygenator on liver viability markers after partial freezing with propylene glycol at  $-15^{\circ}\text{C}$  for 5 days. **a)** Lactate concentration in the portal vein. **b)** Bile production. **c)** Glucose concentration in the portal vein. **d)** pH in the portal vein. **e)** Portal flow rate. **f)** Alanine aminotransferase concentration (ALT) in the IVC. **g)** Photos of the livers at the end of simulated transplantation. Clinical Oxy. Control (white) = 1-day hypothermic preservation perfused using a clinical grade oxygenator, PG = propylene glycol stored for 5 days at  $-15^{\circ}\text{C}$  (light pink) perfused using a clinical grade oxygenator. Stars denote statistical significance (two-way ANOVA, followed by Tukey's post-hoc test):  $*0.01 < p < 0.05$ ;  $**0.001 < p < 0.01$ ;  $***0.0001 < p < 0.001$ ;  $****p < 0.0001$ . Boxes: Floating bars (min to max), with a line at the mean. Where applicable, red dotted lines indicate the clinical benchmark. Source data are provided as a Source Data file.

**Supplementary Table S1: Composition of all solutions used in each phase of the partial freezing protocol.** \*present in UW. BSA = bovine serum albumin, PEG = polyethylene glycol, HES = hydroxyethyl starch, GLY = glycerol, EG = ethylene glycol, PG = propylene glycol.

|                             | Subnormothermic<br>Preconditioning<br>solution | Hypothermic<br>Preloading<br>solution | Storage<br>Solution | Thawing<br>Solution | Recovery<br>Solution | Whole<br>Blood<br>Solution |
|-----------------------------|------------------------------------------------|---------------------------------------|---------------------|---------------------|----------------------|----------------------------|
| <i>Base solution</i>        | WE                                             | WE                                    | UW                  | WE                  | WE                   | WE                         |
| <i>Total volume</i>         | 250 ml                                         | 250 ml                                | 100 ml              | 250 ml              | 500 ml               | 100 ml                     |
| <i>Additives</i>            |                                                |                                       |                     |                     |                      |                            |
| Insulin                     | 200 U/l                                        | 200 U/l                               | 10 U/l              | 20 U/l              | 20 U/l               | 20 U/l                     |
| Heparin                     | 10,000 U/l                                     | 4,000 U/l                             | -                   | 4,000 U/l           | 5,000 U/l            | 5,000 U/l                  |
| Dexamethasone               | 24 mg/l                                        | 24 mg/l                               | 24 mg/l             | 24 mg/l             | 24 mg/l              | 24 mg/l                    |
| Hydrocortisone              | 25 mg/ml                                       | 25 mg/ml                              | -                   | 25 mg/ml            | 25 mg/ml             | 25 mg/ml                   |
| Penicillin                  | 40,000 ug/l                                    | 40,000 ug/l                           | -                   | 40,000 ug/l         | 40,000 ug/l          | 40,000 ug/l                |
| Streptomycin                | 40,000 U/l                                     | 40,000 U/l                            | -                   | 40,000 U/l          | 40,000 U/l           | 40,000 U/l                 |
| Glutathione                 | -                                              | -                                     | 0.922 g/l*          | 1.536 g/l           | 1.536 g/l            | -                          |
| <i>Blood</i>                |                                                |                                       |                     |                     |                      |                            |
| Fresh whole rat blood       | -                                              | -                                     | -                   | -                   | -                    | ~10-12<br>ml/l             |
| <i>Macromolecules</i>       |                                                |                                       |                     |                     |                      |                            |
| BSA                         | 10 g/l                                         | 10 g/l                                | -                   | 10 g/l              | 10 g/l               | 10 g/l                     |
| 35 kDa PEG                  | 20 g/l                                         | 20 g/l                                | 50 g/l              | 20 g/l              | 20 g/l               | -                          |
| HES                         | -                                              | 30 g/l                                | 50 g/l*             | 30 g/l              | -                    | -                          |
| <i>Saccharides</i>          |                                                |                                       |                     |                     |                      |                            |
| 3-O-Methyl D<br>glucose     | 19.42 g/l                                      | 19.42 g/l                             | 19.42 g/l           | 19.42 g/l           | -                    | -                          |
| Raffinose                   | -                                              | 15.12 g/l                             | 17.83 g/l*          | 15.12 g/l           | -                    | -                          |
| Trehalose                   | -                                              | -                                     | 18.92 g/l           | 18.92 g/l           | -                    | -                          |
| <i>Permeating CPA</i>       |                                                |                                       |                     |                     |                      |                            |
| GLY, EG, or PG              | -                                              | 60 ml/l                               | 120 ml/l            | 60 ml/l             | -                    | -                          |
| <i>Ice nucleating agent</i> |                                                |                                       |                     |                     |                      |                            |
| Snomax                      | -                                              | -                                     | 1 g/l               | -                   | -                    | -                          |

**Supplementary Table S2: List of suppliers for each reagent used in partial freezing solutions.**

---

| <i>Reagent</i>                        | <i>Supplier</i>   |
|---------------------------------------|-------------------|
| University of Wisconsin (UW) solution | Bridge to Life    |
| Williams' Medium E                    | Sigma-Aldrich     |
| Insulin (Humulin R)                   | MGH pharmacy      |
| Sodium heparin                        | MGH pharmacy      |
| Dexamethasone                         | Sigma-Aldrich     |
| Hydrocortisone                        | MGH pharmacy      |
| Penicillin-Streptomycin               | Invitrogen        |
| L-Glutathione                         | Sigma-Aldrich     |
| Bovine Serum Albumin (BSA)            | Sigma-Aldrich     |
| 35kDa Polyethylene glycol (PEG)       | Sigma-Aldrich     |
| Hydroxyethyl starch 130/0.4 (HES)     | AK Scientific     |
| 3-O-methyl glucose                    | Chem-Impex        |
| D-Raffinose pentahydrate              | Chem-Impex        |
| D-(+)-Trehalose dihydrate             | Sigma-Aldrich     |
| Glycerol (CAS No. 56-81-5)            | Fisher Scientific |
| Ethylene Glycol (CAS No. 107-21-1)    | Sigma-Aldrich     |
| Propylene Glycol (CAS No. 57-55-6)    | Fisher Scientific |
| Snomax                                | Telemet           |

---
